# Supplementary material
Source: publisher figshare collection journal article supplement (https://tandf.figshare.com/ndownloader/files/29077259)
Supplement: Supplementary file 1 [file 29077259]

**SUPPLEMENTARY B**

|  |  |
| --- | --- |
|  |  |

| **Table 1 – p16-positive oropharyngeal cancer** | | | | |  |  |  | |  |  | |  |
| --- | --- | --- | --- | --- | --- | --- | --- | --- | --- | --- | --- | --- |
| **Clinical characteristics and treatment of p16-positive oropharyngeal patientsa** | | | | | | | | |  |  | |  |
|  |  | **All patients** |  | **M1 patients** | | | **Radical treatment intent** | | | **DM patients** | | |
|  |  | **(N= 2133)** |  | **(N= 31)b** |  |  | **(N= 2032)c** | |  | **(N = 132)d** | | |
|  |  | **Number** |  | **Number** | **%(row)** |  | **Number** | |  | **Number** | | **%(row)** |
| **Gender** |  |  |  |  |  |  |  | |  |  | |  |
| Male |  | 1645 |  | 28 | 1.7 |  | 1568 | |  | 105 | | 6.7 |
| Female |  | 488 |  | 3 | 0.6 |  | 464 | |  | 27 | | 5.8 |
| **T-classification** | |  |  |  |  |  |  | |  |  | |  |
| T1 |  | 576 |  | 4 | 0.7 |  | 560 | |  | 9 | | 1.6 |
| T2 |  | 977 |  | 9 | 0.9 |  | 947 | |  | 66 | | 7.0 |
| T3 |  | 379 |  | 9 | 2.4 |  | 358 | |  | 34 | | 9.5 |
| T4 |  | 151 |  | 7 | 4.6 |  | 122 | |  | 17 | | 13.9 |
| **N-classification** | |  |  |  |  |  |  | |  |  | |  |
| N0 |  | 282 |  | 1 | 0.4 |  | 271 | |  | 14 | | 5.2 |
| N1 |  | 454 |  | 4 | 0.9 |  | 434 | |  | 19 | | 4.4 |
| N2 |  | 1291 |  | 15 | 1.2 |  | 1237 | |  | 88 | | 7.1 |
| N3 |  | 95 |  | 10 | 10.5 |  | 84 | |  | 10 | | 11.9 |
| **Stage** |  |  |  |  |  |  |  | |  |  | |  |
| I |  | 50 |  | 0 | 0.0 |  | 47 | |  | 3 | | 6.4 |
| II |  | 159 |  | 0 | 0.0 |  | 154 | |  | 5 | | 3.2 |
| III |  | 467 |  | 0 | 0.0 |  | 464 | |  | 22 | | 4.7 |
| IV |  | 1440 |  | 31 | 2.2 |  | 1362 | |  | 101 | | 7.4 |
| **Primary treatment intent** | |  |  |  |  |  |  | |  |  | |  |
| Radical radiotherapy | | 1911 |  | 6 | 0.3 |  | 1905 | |  | 129 | | 6.8 |
| Radical surgery + radiotherapy | | 53 |  | 1 | 1.9 |  | 52 | |  | 2 | | 3.8 |
| Radical surgery alone | | 75 |  | 0 | 0.0 |  | 75 | |  | 1 | | 1.3 |
| Palliative treatment | | 57 |  | 18 | 31.6 |  | 0 | |  | 0 | | 0.0 |
| No treatment | | 20 |  | 6 | 30.0 |  | 0 | |  | 0 | | 0.0 |
| **Supplementary B:**  Tables showing the clinical characteristics and treatment according to HNSCC subsite.  aMissing values are omitted from the table if ≤5% of total | | | | | | | |  | | | | |
| bM1: Patients with distant metastasis at time of diagnosis | | | | | | | |  | | | | |
| cPrimary treatment intent either radiotherapy or surgery - excluding M1 patients | | | | | | | | | | |  | |
| dDistant metastasis in patients treated with either radical radiotherapy or surgery | | | | | | | | | | |  | |

| **Table 1 – p16-negative oropharyngeal cancer** | | | | |  |  |  |  |  |  |
| --- | --- | --- | --- | --- | --- | --- | --- | --- | --- | --- |
| **Clinical characteristics and treatment of p16-negative oropharyngeal patientsa** | | | | | | | |  |  |  |
|  |  | **All patients** |  | **M1 patients** | | | **Radical treatment intent** | | **DM patients** | |
|  |  | **(N= 1319)** |  | **(N= 49)b** |  |  | **(N= 1047)c** |  | **(N = 100)d** | |
|  |  | **Number** |  | **Number** | **%(row)** |  | **Number** |  | **Number** | **%(row)** |
| **Gender** |  |  |  |  |  |  |  |  |  |  |
| Male |  | 912 |  | 36 | 3.9 |  | 720 |  | 77 | 10.7 |
| Female |  | 407 |  | 13 | 3.2 |  | 327 |  | 23 | 7.0 |
| **T-classification** | |  |  |  |  |  |  |  |  |  |
| T1 |  | 205 |  | 4 | 2.0 |  | 186 |  | 8 | 4.3 |
| T2 |  | 473 |  | 12 | 2.5 |  | 401 |  | 34 | 8.5 |
| T3 |  | 356 |  | 10 | 2.8 |  | 282 |  | 35 | 12.4 |
| T4 |  | 229 |  | 19 | 8.3 |  | 148 |  | 22 | 14.9 |
| T4 unknown | | 56 |  | 4 | 7.1 |  |  |  |  |  |
| **N-classification** | |  |  |  |  |  |  |  |  |  |
| N0 |  | 375 |  | 2 | 0.5 |  | 324 |  | 6 | 1.9 |
| N1 |  | 199 |  | 4 | 2.0 |  | 162 |  | 14 | 8.6 |
| N2 |  | 657 |  | 32 | 4.9 |  | 525 |  | 73 | 13.9 |
| N3 |  | 60 |  | 10 | 16.7 |  | 27 |  | 7 | 25.9 |
| **Stage** |  |  |  |  |  |  |  |  |  |  |
| I |  | 85 |  | 0 | 0.0 |  | 79 |  | 0 | 0.0 |
| II |  | 188 |  | 0 | 0.0 |  | 163 |  | 3 | 1.8 |
| III |  | 214 |  | 0 | 0.0 |  | 185 |  | 11 | 5.9 |
| IV |  | 802 |  | 49 | 6.1 |  | 610 |  | 86 | 14.1 |
| **Primary treatment intent** | |  |  |  |  |  |  |  |  |  |
| Radical radiotherapy | | 1000 |  | 13 | 1.3 |  | 987 |  | 99 | 10.0 |
| Radical surgery + radiotherapy | | 18 |  | 1 | 5.6 |  | 17 |  | 0 | 0.0 |
| Radical surgery alone | | 43 |  | 0 | 0.0 |  | 43 |  | 1 | 2.3 |
| Palliative treatment | | 152 |  | 25 | 16.4 |  | 0 |  | 0 | 0.0 |
| No treatment | | 68 |  | 9 | 13.2 |  | 0 |  | 0 | 0.0 |

| **Table 1 - Hypopharynx** | |  |  |  |  |  |  |  |  |  |
| --- | --- | --- | --- | --- | --- | --- | --- | --- | --- | --- |
| **Clinical characteristics and treatment of hypopharyngeal patientsa** | | | | | |  |  |  |  |  |
|  |  | **All patients** |  | **M1 patients** | | | **Radical treatment intent** | | **DM patients** | |
|  |  | **(N=872)** |  | **(N=61)b** |  |  | **(N=660)c** |  | **(N = 122)d** | |
|  |  | **Number** |  | **Number** | **%(row)** |  | **Number** |  | **Number** | **%(row)** |
| **Gender** |  |  |  |  |  |  |  |  |  |  |
| Male |  | 717 |  | 50 | 7.0 |  | 541 |  | 106 | 19.6 |
| Female |  | 155 |  | 11 | 7.1 |  | 119 |  | 16 | 13.4 |
| **T-classification** | |  |  |  |  |  |  |  |  |  |
| T1 |  | 103 |  | 5 | 4.9 |  | 88 |  | 11 | 12.5 |
| T2 |  | 286 |  | 16 | 5.6 |  | 240 |  | 45 | 18.8 |
| T3 |  | 235 |  | 17 | 7.2 |  | 169 |  | 32 | 18.9 |
| T4 |  | 207 |  | 16 | 7.7 |  | 140 |  | 30 | 21.4 |
| T unknown |  | 41 |  | 6 | 14.6 |  |  |  |  |  |
| **N-classification** | |  |  |  |  |  |  |  |  |  |
| N0 |  | 172 |  | 6 | 3.5 |  | 136 |  | 13 | 9.6 |
| N1 |  | 129 |  | 5 | 3.9 |  | 111 |  | 11 | 9.9 |
| N2 |  | 472 |  | 38 | 8.1 |  | 355 |  | 85 | 23.9 |
| N3 |  | 79 |  | 8 | 10.1 |  | 53 |  | 13 | 24.5 |
| N unknown |  | 20 |  | 4 | 0.2 |  |  |  |  |  |
| **Stage** |  |  |  |  |  |  |  |  |  |  |
| I |  | 29 |  | 0 | 0.0 |  | 24 |  | 1 | 4.2 |
| II |  | 51 |  | 0 | 0.0 |  | 46 |  | 5 | 10.9 |
| III |  | 146 |  | 0 | 0.0 |  | 127 |  | 10 | 7.9 |
| IV |  | 630 |  | 61 | 9.7 |  | 458 |  | 106 | 23.1 |
| **Primary treatment intent** | |  |  |  |  |  |  |  |  |  |
| Radical radiotherapy | | 666 |  | 13 | 2.0 |  | 653 |  | 120 | 18.4 |
| Radical surgery + radiotherapy | | 5 |  | 0 | 0.0 |  | 5 |  | 2 | 40.0 |
| Radical surgery alone | | 2 |  | 0 | 0.0 |  | 2 |  | 0 | 0.0 |
| Palliative treatment | | 131 |  | 32 | 24.4 |  | 0 |  | 0 | 0.0 |
| No treatment | | 51 |  | 14 | 27.5 |  | 0 |  | 0 | 0.0 |

| **Table 1 - Nasopharynx** | |  |  |  |  |  |  |  |  |  |
| --- | --- | --- | --- | --- | --- | --- | --- | --- | --- | --- |
| **Clinical characteristics and treatment of nasopharyngeal patientsa** | | | | | |  |  |  |  |  |
|  |  | **All patients** |  | **M1 patients** | | | **Radical treatment intent** | | **DM patients** | |
|  |  | **(N= 256)** |  | **(N= 14)b** |  |  | **(N = 211)c** |  | **(N = 32 )d** | |
|  |  | **Number** |  | **Number** | **%(row)** |  | **Number** |  | **Number** | **%(row)** |
| **Gender** |  |  |  |  |  |  |  |  |  |  |
| Male |  | 187 |  | 11 | 5.9 |  | 154 |  | 24 | 15.6 |
| Female |  | 69 |  | 3 | 4.3 |  | 57 |  | 8 | 14.0 |
| **T-classification** | |  |  |  |  |  |  |  |  |  |
| T1 |  | 86 |  | 3 | 3.5 |  | 79 |  | 7 | 8.9 |
| T2 |  | 61 |  | 0 | 0.0 |  | 57 |  | 7 | 12.3 |
| T3 |  | 40 |  | 4 | 10.0 |  | 29 |  | 9 | 31.0 |
| T4 |  | 58 |  | 7 | 12.1 |  | 40 |  | 8 | 20.0 |
| **N-classification** | |  |  |  |  |  |  |  |  |  |
| N0 |  | 65 |  | 3 | 4.6 |  | 52 |  | 3 | 5.8 |
| N1 |  | 45 |  | 1 | 2.2 |  | 44 |  | 3 | 6.8 |
| N2 |  | 116 |  | 8 | 6.9 |  | 96 |  | 20 | 20.8 |
| N3 |  | 23 |  | 2 | 8.7 |  | 17 |  | 6 | 35.3 |
| **Stage** |  |  |  |  |  |  |  |  |  |  |
| I |  | 23 |  | 0 | 0.0 |  | 20 |  | 0 | 0.0 |
| II |  | 46 |  | 0 | 0.0 |  | 45 |  | 2 | 4.4 |
| III |  | 93 |  | 0 | 0.0 |  | 85 |  | 16 | 18.8 |
| IV |  | 86 |  | 14 | 16.3 |  | 58 |  | 14 | 24.1 |
| **Primary treatment intent** | |  |  |  |  |  |  |  |  |  |
| Radical radiotherapy | | 211 |  | 2 | 0.9 |  | 209 |  | 32 | 15.3 |
| Radical surgery + radiotherapy | | 1 |  | 0 | 0.0 |  | 1 |  | 0 | 0.0 |
| Radical surgery alone | | 1 |  | 0 | 0.0 |  | 1 |  | 0 | 0.0 |
| Palliative treatment | | 24 |  | 9 | 37.5 |  | 0 |  | 0 | 0.0 |
| No treatment | | 14 |  | 3 | 21.4 |  | 0 |  | 0 | 0.0 |

| **Table 1 - Glottic Larynx** | | |  |  |  |  |  |  |  |  |
| --- | --- | --- | --- | --- | --- | --- | --- | --- | --- | --- |
| **Clinical characteristics and treatment of glottic laryngeal patientsa** | | | | | |  |  |  |  |  |
|  |  | **All patients** |  | **M1 patients** | | | **Radical treatment intent** | | **DM patients** | |
|  |  | **(N=1516)** |  | **(N=5)b** |  |  | **(N=1422)c** |  | **(N=40)d** |  |
|  |  | **Number** |  | **Number** | **%(row)** |  | **Number** |  | **Number** | **%(row)** |
| **Gender** |  |  |  |  |  |  |  |  |  |  |
| Male |  | 1319 |  | 4 | 0.3 |  | 1245 |  | 38 | 3.1 |
| Female |  | 197 |  | 1 | 0.5 |  | 177 |  | 2 | 1.1 |
| **T-classification** | |  |  |  |  |  |  |  |  |  |
| T1 |  | 847 |  | 0 | 0.0 |  | 834 |  | 4 | 0.5 |
| T2 |  | 433 |  | 1 | 0.2 |  | 404 |  | 15 | 3.7 |
| T3 |  | 159 |  | 2 | 1.3 |  | 127 |  | 12 | 9.4 |
| T4 |  | 67 |  | 2 | 3.0 |  | 53 |  | 9 | 17.0 |
| **N-classification** | |  |  |  |  |  |  |  |  |  |
| N0 |  | 1386 |  | 3 | 0.2 |  | 1320 |  | 28 | 2.1 |
| N1 |  | 48 |  | 2 | 4.2 |  | 34 |  | 5 | 14.7 |
| N2 |  | 69 |  | 0 | 0.0 |  | 63 |  | 7 | 11.1 |
| N3 |  | 2 |  | 0 | 0.0 |  | 2 |  | 0 | 0.0 |
| **Stage** |  |  |  |  |  |  |  |  |  |  |
| I |  | 840 |  | 0 | 0.0 |  | 827 |  | 4 | 0.5 |
| II |  | 382 |  | 0 | 0.0 |  | 358 |  | 11 | 3.1 |
| III |  | 158 |  | 0 | 0.0 |  | 131 |  | 11 | 8.4 |
| IV |  | 124 |  | 5 | 4.0 |  | 102 |  | 14 | 13.7 |
| **Primary treatment intent** | |  |  |  |  |  |  |  |  |  |
| Radical radiotherapy | | 1153 |  | 1 | 0.1 |  | 1152 |  | 35 | 3.0 |
| Radical surgery + radiotherapy | | 54 |  | 0 | 0.0 |  | 54 |  | 2 | 3.7 |
| Radical surgery alone | | 216 |  | 0 | 0.0 |  | 216 |  | 3 | 1.4 |
| Palliative treatment | | 51 |  | 2 | 3.9 |  | 0 |  | 0 | 0.0 |
| No treatment | | 30 |  | 2 | 6.7 |  | 0 |  | 0 | 0.0 |

| **Table 1 - Non-glottic Larynx** | | |  |  |  |  |  |  |  |  |
| --- | --- | --- | --- | --- | --- | --- | --- | --- | --- | --- |
| **Clinical characteristics and treatment of non-glottic laryngeal patientsa** | | | | | |  |  |  |  |  |
|  |  | **All patients** |  | **M1 patients** | |  | **Radical treatment intent** |  | **DM patients** | |
|  |  | **(N=890)** |  | **(N=21)b** |  |  | **(N=744)c** |  | **(N=56)d** |  |
|  |  | **Number** |  | **Number** | **%(row)** |  | **Number** |  | **Number** | **%(row)** |
| **Gender** |  |  |  |  |  |  |  |  |  |  |
| Male |  | 649 |  | 18 | 2.8 |  | 540 |  | 48 | 8.9 |
| Female |  | 241 |  | 3 | 1.2 |  | 204 |  | 8 | 3.9 |
| **T-classification** | |  |  |  |  |  |  |  |  |  |
| T1 |  | 178 |  | 2 | 1.1 |  | 163 |  | 5 | 3.1 |
| T2 |  | 398 |  | 6 | 1.5 |  | 360 |  | 22 | 6.1 |
| T3 |  | 175 |  | 5 | 2.9 |  | 138 |  | 19 | 13.8 |
| T4 |  | 123 |  | 7 | 5.7 |  | 80 |  | 10 | 12.5 |
| **N-classification** | |  |  |  |  |  |  |  |  |  |
| N0 |  | 400 |  | 2 | 0.5 |  | 353 |  | 14 | 4.0 |
| N1 |  | 138 |  | 2 | 1.4 |  | 120 |  | 4 | 3.3 |
| N2 |  | 309 |  | 13 | 4.2 |  | 256 |  | 35 | 13.7 |
| N3 |  | 20 |  | 3 | 15.0 |  | 11 |  | 3 | 27.3 |
| **Stage** |  |  |  |  |  |  |  |  |  |  |
| I |  | 114 |  | 0 | 0.0 |  | 107 |  | 2 | 1.9 |
| II |  | 183 |  | 0 | 0.0 |  | 168 |  | 5 | 3.0 |
| III |  | 184 |  | 0 | 0.0 |  | 162 |  | 8 | 4.9 |
| IV |  | 386 |  | 21 | 5.4 |  | 303 |  | 41 | 13.5 |
| **Primary treatment intent** | |  |  |  |  |  |  |  |  |  |
| Radical radiotherapy | | 733 |  | 5 | 0.7 |  | 728 |  | 55 | 7.6 |
| Radical surgery + radiotherapy | | 11 |  | 0 | 0.0 |  | 11 |  | 1 | 9.1 |
| Radical surgery alone | | 5 |  | 0 | 0.0 |  | 5 |  | 0 | 0.0 |
| Palliative treatment | | 84 |  | 13 | 15.5 |  | 0 |  | 0 | 0.0 |
| No treatment | | 33 |  | 3 | 9.1 |  | 0 |  | 0 | 0.0 |
